# Supplementary material for: Stability and Safety Traits of Novel Cyclosporine A and Tacrolimus Ophthalmic Galenic Formulations Involved in Vernal Keratoconjunctivitis Treatment by a High-Resolution Mass Spectrometry Approach
Source: Pharmaceutics. 2020 Apr 20;12(4):378. doi: 10.3390/pharmaceutics12040378 (PMC7238033; doi:10.3390/pharmaceutics12040378)
Supplement: Supplementary file 1 [file pharmaceutics-12-00378-s001.pdf]

## Supplementary Materials:

# Stability and Safety Traits of Novel Cyclosporine A and Tacrolimus Ophthalmic Galenic Formulations Involved in Vernal Keratoconjunctivitis Treatment by a High-Resolution Mass Spectrometry Approach

Daniele Giovanni Ghiglioni <sup>1</sup>, Piera Anna Martino <sup>2</sup>, Gaia Bruschi <sup>3,\*</sup>, Davide Vitali <sup>4</sup>, Silvia Osnaghi <sup>1</sup>, Maria Grazia Corti <sup>1</sup> and Giangiacomo Beretta <sup>5</sup>

<sup>1</sup> Fondazione IRCCS Ca' Granda Ospedale Maggiore Policlinico di Milano; Via Francesco Sforza, 28, 20122 Milan (MI), Italy; daniele.ghiglioni@policlinico.mi.it (D.G.G.); silvia.osnaghi@policlinico.mi.it (S.O.); mariagrazia.corti@policlinico.mi.it (M.G.C.)

<sup>2</sup> Department of Veterinary Medicine, Università degli Studi di Milano, Via Celoria 10, 20133 Milan (MI), Italy; piera.martino@unimi.it

<sup>3</sup> Department of Clinical and Community Sciences, University of Milan, Via della Commenda, 19, 20122 Milan (MI), Italy

<sup>4</sup> Bruttomesso pharmacy, galenic laboratory; Piazza Guglielmo Marconi, 20, 26013 Crema (CR), Italy; lab@farmaciabruttomesso.it

<sup>5</sup> Department of Environmental Science and Policy, Università degli Studi di Milano, Via Mangiagalli 25, 20133 Milan (MI), Italy; giangiacomo.beretta@unimi.it

\* Correspondence: gaia.bruschi@unimi.it

Received: 29 February 2020; Accepted: 16 April 2020; Published: 20 April 2020

**Table S1.** Research studies collection on Cyclosporine A and Tacrolimus based ophthalmic formulations for Vernal keratoconjunctivitis treatments.

| Author                          | years | Active compound concentration | Formulation type | Pathology | Treatment/experiment duration | Results                                                                                    |
|---------------------------------|-------|-------------------------------|------------------|-----------|-------------------------------|--------------------------------------------------------------------------------------------|
| Cyclosporine based formulations |       |                               |                  |           |                               |                                                                                            |
| Clinical trial                  |       |                               |                  |           |                               |                                                                                            |
| BenEzra                         | 1986  | 2%                            | Lacrimart        | VKC       | 6 weeks                       | Signs and symptoms improvement after the first week of treatment.                          |
| Secchi                          | 1990  | 2%                            | oil              | VKC       | 4–9 months                    | Within the first 15 days, both symptoms and signs of the condition improved significantly. |
| Pucci                           | 2002  | 2%                            | oil              | VKC       | 4 times a day for 4 months    | Signs and symptoms improvement after two weeks of treatment.                               |
| Akpek                           | 2004  | 0.05%                         | Lacrimart        | AKC       | 4–6 times a day for 1 month   | Signs and symptoms improvement after one month of treatment.                               |
| Kilic                           | 2006  | 2%                            | Lacrimart        | VKC       | 5 times a day for 14 weeks    | Signs and symptoms improvement after two weeks of treatment.                               |
| Spadavecchia                    | 2006  | 1% and 1.25%                  | Lacrimart        | VKC       | 4 times a day for 4 months    | Signs and symptoms improvement after two weeks of treatment in both groups.                |
| Oczan                           | 2007  | 0.05%                         | Lacrimart        | VKC, AKC  | 2–4 times a day for 6 months  | Signs and symptoms improvement after six months of treatment.                              |
| Pucci                           | 2010  | 1–2%                          | Lacrimart        | VKC       | 2–4 times a day for 2–7 years | Signs improvement during the study                                                         |

|                                        |      |                  |                           |                                       |                               | period.                                                                                                                    |
|----------------------------------------|------|------------------|---------------------------|---------------------------------------|-------------------------------|----------------------------------------------------------------------------------------------------------------------------|
| Lambiase                               | 2011 | 0.05% and 0.025% | oil                       | VKC                                   | 2 times a day for 6 months    | Signs and symptoms improvement during the study period.                                                                    |
| Takamura                               | 2011 | 0.1%             | Lacrimart                 | VKC                                   | 6 months                      | Signs and symptoms improvement after six months of treatment.                                                              |
| Keklicki                               | 2014 | 0.05%            | Lacrimart                 | VKC                                   | 4 times a day for 4 weeks     | Signs and symptoms improvement after one month of treatment.                                                               |
| Yucel                                  | 2016 | 0.05%            | Lacrimart                 | VKC                                   | 4 times a day for 3 months    | Signs and symptoms improvement after one month of treatment.                                                               |
| Leonardi                               | 2019 | 0.1%             | Cationic emulsion         | VKC                                   | 2–4 times a day for 4 months  | Signs and symptoms improvement after four months of treatment.                                                             |
| <b>Compositional/stability studies</b> |      |                  |                           |                                       |                               |                                                                                                                            |
| Chennell                               | 2017 | 1–2%             | Micellar solution         | In vitro                              | -                             | The micellar formulation can be stored at 5 °C or at ≤25 °C for up to 6months.                                             |
| Lallemmand                             | 2017 | variable         | Lacrimart, oil            | VKC, dry eye                          | variable                      | Restasis and Ikervis are the two major and successful emulsion products                                                    |
| Shen                                   | 2018 | variable         | mPEG-PLA polymer micelles | Human corneal epithelial and rabbits. | -                             | mPEG-PLA diblock polymer can be potentially used as a nanoscopic carrier to deliver hydrophobic drugs to the ocular region |
| <b>Tacrolimus based formulations</b>   |      |                  |                           |                                       |                               |                                                                                                                            |
| <b>Clinical trials</b>                 |      |                  |                           |                                       |                               |                                                                                                                            |
| Vichyanond                             | 2004 | 0.1%             | ointment                  | VKC                                   | 1–2 times a day for 1 month   | Signs and symptoms improvement after one month of treatment.                                                               |
| Miyazaki                               | 2008 | 0.02%            | ointment                  | VKC, AKC                              | 1–4 times a day for 26 months | Signs improvement during the study period.                                                                                 |
| Ohashi                                 | 2010 | 0.1%             | Lacrimart                 | VKC, AKC                              | 2 times a day for 1 month     | Signs and symptoms improvement after one month of treatment.                                                               |
| Kheirkhah                              | 2011 | 0.005%           | Lacrimart                 | VKC                                   | 4 times a day for 10 months   | Signs and symptoms improvement during the study period.                                                                    |
| Labcharoenwongs                        | 2012 | 0.1%             | ointment                  | VKC                                   | 2 times a day for 2 months    | Signs and symptoms improvement after one month of treatment.                                                               |
| Fukushima                              | 2014 | 0.1%             | Lacrimart                 | VKC, AKC                              | 2 times a day for 6 months    | Signs and symptoms improvement after one month of treatment.                                                               |
| Pucci                                  | 2015 | 0.1%             | Lacrimart                 | VKC                                   | 3 times a day for 3 weeks     | Signs and symptoms improvement after three weeks of treatment.                                                             |
| Al-Amri                                | 2016 | 0.1%             | ointment                  | VKC                                   | Variable                      | Signs and symptoms improvement after six weeks of treatment.                                                               |
| Chatterjee                             | 2016 | 0.03%            | ointment                  | VKC                                   | 3 times a day for 3 months    | Signs and symptoms improvement after four weeks of treatment.                                                              |
| Barot                                  | 2016 | 0.1%             | ointment                  | VKC, AKC                              | 2 times a day for 3 months    | Signs and symptoms improvement after four weeks of treatment.                                                              |

|                                        |      |       |                                                                           |                |                            |                                                                                                                                                         |
|----------------------------------------|------|-------|---------------------------------------------------------------------------|----------------|----------------------------|---------------------------------------------------------------------------------------------------------------------------------------------------------|
| Miyazaki <sup>2</sup>                  | 2017 | 0.1%  | Lacrimart                                                                 | VKC, AKC       | 2 times a day for 3 months | Signs improvement after three months of treatment.                                                                                                      |
| <b>Compositional/stability studies</b> |      |       |                                                                           |                |                            |                                                                                                                                                         |
| Zeng                                   | 2016 | 0.1%  | Niosomes and mucoadhesive hyaluronic acid                                 | rabbits        | -                          | The hybrid system facilitated FK506 ocular delivery on mucoadhesion, precorneal retention, aqueous humor pharmacokinetics and transcorneal permeability |
| Ezquer-Garin                           | 2017 | 0.03% | Lacrimart                                                                 | In vitro       | -                          | Tacrolimus in eye drop solution was stable for 20 days when stored at 25 °C and for at least 85 days when stored at 2–8 °C or between –15 and –25 °C    |
| Luaces-Rodríguez                       | 2018 | 0.03% | BBS (Balanced Salt Solution), PVA (Polyvinyl alcohol) and Hyaluronic Acid | Rats, VKC, AKC | 6 months                   | Formulations with PVA and Hyaluronic Acid present more retention time on the ocular surface of rats than PBS                                            |

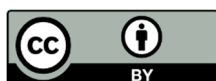

© 2020 by the authors. Licensee MDPI, Basel, Switzerland. This article is an open access article distributed under the terms and conditions of the Creative Commons Attribution (CC BY) license (<http://creativecommons.org/licenses/by/4.0/>).
